# Supplementary material
Source: PubMed Central journal article supplement (PMC1805574)

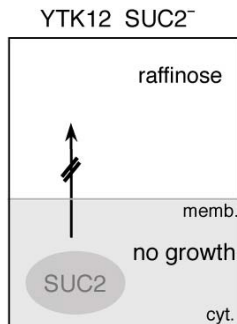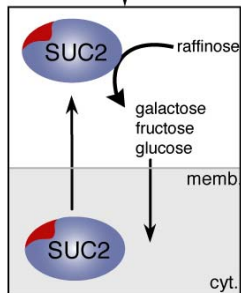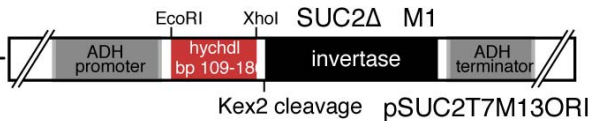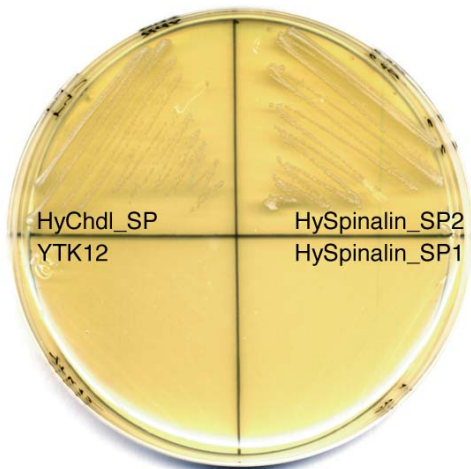

Supplement: pnas_0604501104_1.pdf [file pnas_0604501104_1.pdf]

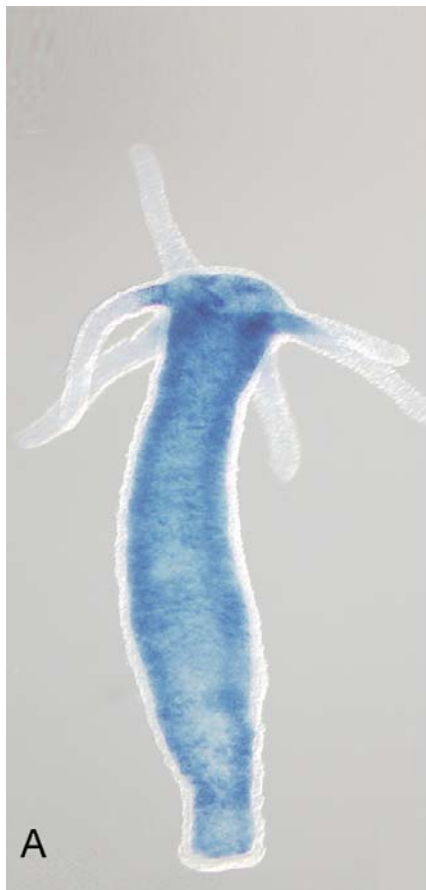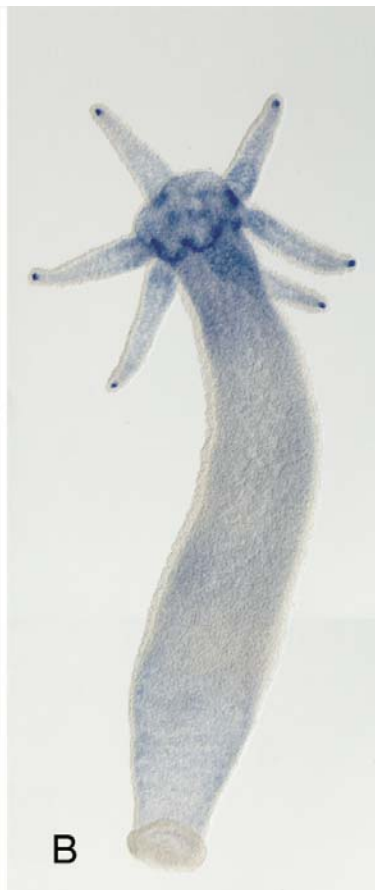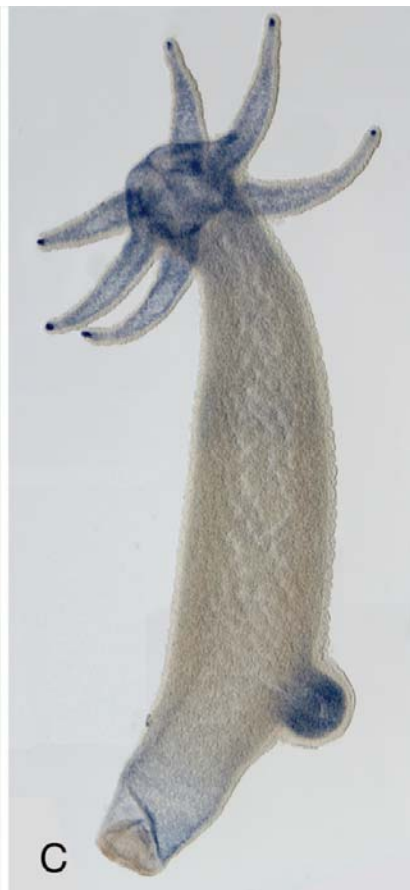

Supplement: pnas_0604501104_3.pdf [file pnas_0604501104_3.pdf]

wnt3a

chordin

EF1 $\alpha$

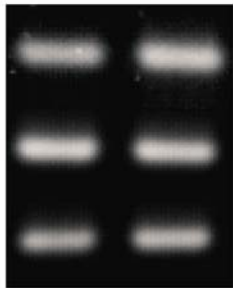

control

3 hrs

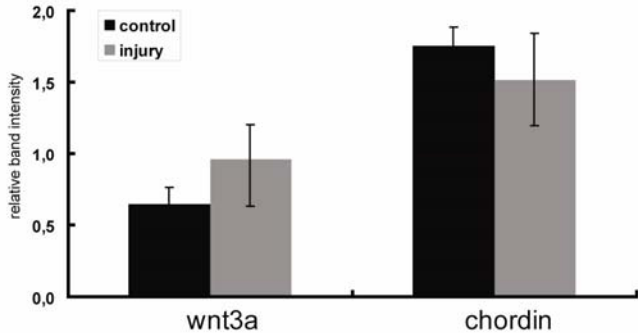

Supplement: pnas_0604501104_4.pdf [file pnas_0604501104_4.pdf]

wnt positive regenerates, %

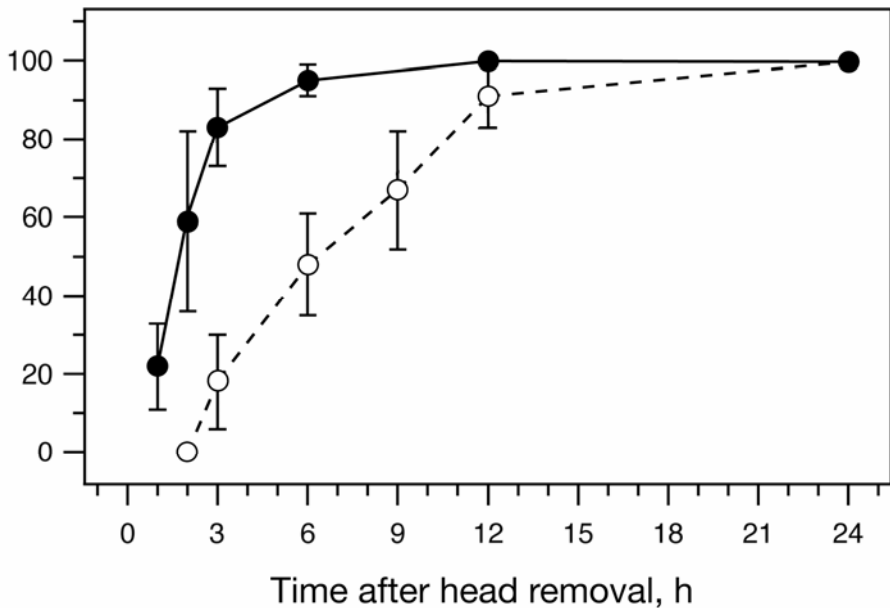

Supplement: pnas_0604501104_5.pdf [file pnas_0604501104_5.pdf]

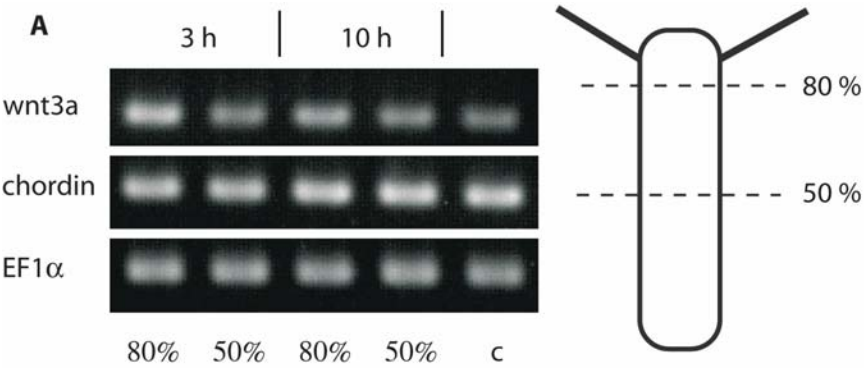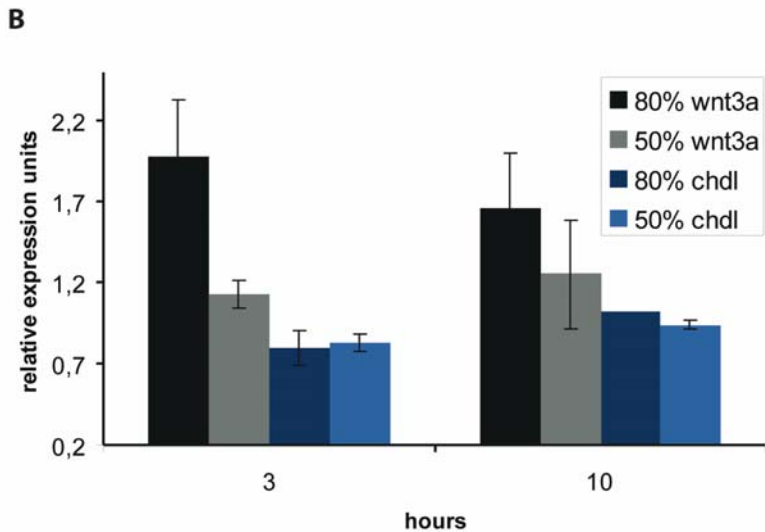

Supplement: pnas_0604501104_6.pdf [file pnas_0604501104_6.pdf]

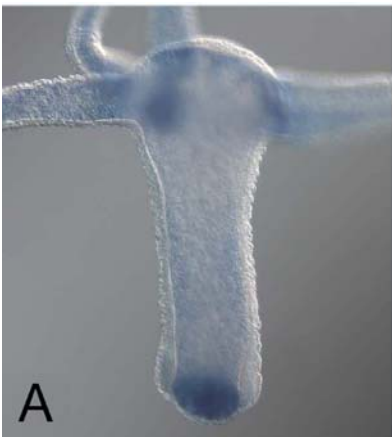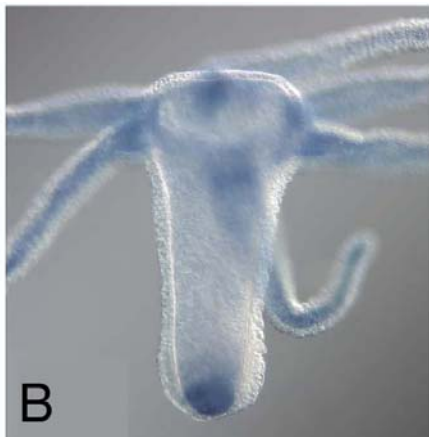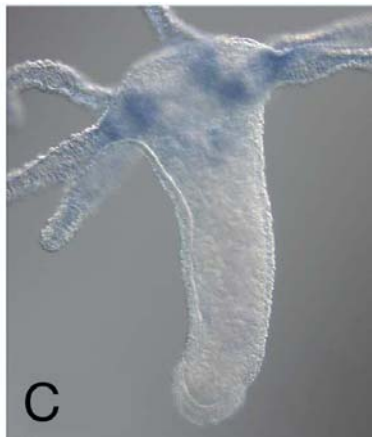

Supplement: pnas_0604501104_7.pdf [file pnas_0604501104_7.pdf]
